# Supplementary material for: Determination of Metals Content in Wine Samples by Inductively Coupled Plasma-Mass Spectrometry
Source: PubMed Central journal article supplement (PMC6278765; doi:10.3390/molecules23112886), 2018-11-05
Supplement: molecules-23-02886-s001.pdf [file molecules-23-02886-s001.pdf]

**Table S1.** Results of the metals content in wine samples ( $n = 3; k = 2, \alpha = 0.05$ ).

| N <sub>sample</sub> | Grape Type   | Region of Poland | Location [Mas] | Color | Metal Content (µg/L) or (mg/L) /Isotope Mass (amu) |              |              |              |              |              |              |             |              |              |              |              |              |             |              |              |              |              |              |              |             |             |              |              |            |          |               |             |             |            |
|---------------------|--------------|------------------|----------------|-------|----------------------------------------------------|--------------|--------------|--------------|--------------|--------------|--------------|-------------|--------------|--------------|--------------|--------------|--------------|-------------|--------------|--------------|--------------|--------------|--------------|--------------|-------------|-------------|--------------|--------------|------------|----------|---------------|-------------|-------------|------------|
|                     |              |                  |                |       | [µg/L]                                             |              |              |              |              |              |              |             |              |              |              |              |              |             |              |              |              |              |              |              |             |             | [mg/L]       |              |            |          |               |             |             |            |
|                     |              |                  |                |       | Ag 107                                             | Al 27        | As 75        | Zr 90        | Ba 138       | Bi 209       | Cd 111       | Co 59       | Cr 52        | Cu 63        | Fe 56        | Hg 201       | V 51         | Li 7        | Mo 98        | Na 23        | Ni 60        | Pb 206       | Sb 121       | Se 78        | Sn 115      | Sr 88       | Ti 47        | Tl 205       | Mg 25      | K 41     | Mn 55         | B 10        | Zn 64       | Ca 40      |
| 1W                  | Solaris      | W                | 125            | w     | 4.92 ± 0.15                                        | 206.1 ± 7.8  | 290.5 ± 28   | 10.91 ± 0.40 | 65.62 ± 1.12 | 456.1 ± 12.3 | 1.05 ± 0.16  | 2.05 ± 0.30 | 16.32 ± 0.75 | 396.2 ± 11.8 | 424.1 ± 12.0 | 0.51 ± 0.091 | 15.31 ± 0.45 | 1.68 ± 0.20 | 39.11 ± 1.13 | 170.3 ± 7.8  | 87.21 ± 1.47 | 23.51 ± 0.43 | 13.21 ± 0.34 | 139.1 ± 2.4  | 200.2 ± 7.9 | 126.1 ± 2.4 | 46.91 ± 1.1  | 2.37 ± 0.31  | 84.8 ± 1.5 | 422 ± 12 | 0.506 ± 0.091 | 2.94 ± 0.17 | 4.95 ± 0.30 | 43.4 ± 1.1 |
| 2W                  | Solaris      | W                | 125            | w     | 4.41 ± 0.16                                        | 64.12 ± 1.12 | 92.71 ± 2.9  | 5.81 ± 0.30  | 118.1 ± 2.3  | 118.7 ± 2.0  | 0.56 ± 0.091 | 1.61 ± 0.26 | 10.31 ± 0.43 | 394.3 ± 11.5 | 390.6 ± 11.8 | 0.47 ± 0.090 | 6.18 ± 0.37  | 1.41 ± 0.18 | 18.61 ± 0.50 | 333.3 ± 10.2 | 80.72 ± 1.51 | 22.22 ± 0.45 | 6.89 ± 0.22  | 88.03 ± 1.51 | 43.7 ± 1.1  | 142.2 ± 2.5 | 36.72 ± 1.12 | 1.08 ± 0.13  | 64.1 ± 1.3 | 591 ± 14 | 0.484 ± 0.089 | 2.73 ± 0.19 | 5.77 ± 0.31 | 79.6 ± 1.8 |
| 3W                  | Seyval Blanc | W                | 125            | w     | 4.21 ± 0.12                                        | 1511 ± 12    | 38.42 ± 0.54 | 8.33 ± 0.39  | 136.5 ± 2.5  | 85.77 ± 1.71 | 0.66 ± 0.096 | 1.15 ± 0.20 | 4.94 ± 0.22  | 53.95 ± 0.54 | 357.2 ± 11.6 | 0.45 ± 0.087 | 8.26 ± 0.42  | 2.91 ± 0.27 | 12.51 ± 0.43 | 1632 ± 25    | 16.51 ± 1.12 | 16.22 ± 0.37 | 4.84 ± 0.21  | 49.31 ± 1.32 | 29.9 ± 0.56 | 355.1 ± 6.4 | 34.63 ± 1.15 | 1.11 ± 0.10  | 65 ± 1.3   | 600 ± 15 | 1.26 ± 0.20   | 2.34 ± 0.18 | 2.02 ± 0.23 | 80.2 ± 1.9 |
| 4W                  | Seyval Blanc | W                | 125            | w     | 4.29 ± 0.17                                        | 1608 ± 13    | 24.24 ± 0.43 | 7.49 ± 0.36  | 137.5 ± 2.4  | 70.98 ± 1.53 | 0.65 ± 0.094 | 1.12 ± 0.21 | 4.87 ± 0.23  | 54.41 ± 0.54 | 351.3 ± 11.4 | 0.43 ± 0.086 | 7.03 ± 0.40  | 2.83 ± 0.29 | 9.87 ± 0.30  | 1633 ± 27    | 18.22 ± 1.19 | 15.77 ± 0.34 | 3.85 ± 0.20  | 38.91 ± 1.01 | 18.2 ± 0.34 | 354.5 ± 6.2 | 34.71 ± 1.14 | 0.98 ± 0.023 | 84 ± 1.5   | 757 ± 17 | 1.28 ± 0.21   | 2.45 ± 0.16 | 2.18 ± 0.21 | 59.7 ± 1.6 |
| 5W                  | Bianca       | KP               | 74             | w     | 2.95 ± 0.10                                        | 145.2 ± 5.1  | 14.31 ± 0.21 | 2.14 ± 0.23  | 75.64 ± 1.31 | 51.91 ± 1.21 | 0.51 ± 0.091 | 1.67 ± 0.26 | 12.11 ± 0.56 | 19.11 ± 0.34 | 613.2 ± 15.8 | 0.43 ± 0.082 | 2.77 ± 0.23  | 4.73 ± 0.31 | 7.41 ± 0.32  | 305.5 ± 10.5 | 29.61 ± 1.25 | 18.11 ± 0.38 | 2.61 ± 0.19  | 25.71 ± 1.02 | 7.54 ± 0.45 | 239.6 ± 7.9 | 28.61 ± 1.11 | 0.81 ± 0.023 | 135 ± 1.8  | 733 ± 18 | 0.940 ± 0.18  | 3.05 ± 0.21 | 8.73 ± 0.37 | 44.2 ± 1.2 |

| No <sub>sample</sub> | Grape Type | Region of Poland                | Location [Masl] | Color | Metal Content (µg/L) or (mg/L) /Isotope Mass (amu) |               |              |              |              |              |              |              |             |              |              |              |              |              |             |              |              |              |              |             |              |             |              |              |              |            |           |               |             |             |            |
|----------------------|------------|---------------------------------|-----------------|-------|----------------------------------------------------|---------------|--------------|--------------|--------------|--------------|--------------|--------------|-------------|--------------|--------------|--------------|--------------|--------------|-------------|--------------|--------------|--------------|--------------|-------------|--------------|-------------|--------------|--------------|--------------|------------|-----------|---------------|-------------|-------------|------------|
|                      |            |                                 |                 |       | [µg/L]                                             |               |              |              |              |              |              |              |             |              |              |              |              |              |             |              |              | [mg/L]       |              |             |              |             |              |              |              |            |           |               |             |             |            |
|                      |            |                                 |                 |       | Ag<br>107                                          | Al<br>27      | As<br>75     | Zr<br>90     | Ba<br>138    | Bi<br>209    | Cd<br>111    | Co<br>59     | Cr<br>52    | Cu<br>63     | Fe 56        | Hg<br>201    | V<br>51      | Li 7         | Mo 98       | Na 23        | Ni 60        | Pb<br>206    | Sb<br>121    | Se 78       | Sn<br>115    | Sr 88       | Ti 47        | Tl<br>205    | Mg<br>25     | K 41       | Mn 55     | B 10          | Zn<br>64    | Ca<br>40    |            |
| 6                    | W          | Solaris                         | KP              | 74    | w                                                  | 1.840 ± 0.091 | 170.5 ± 5.8  | 19.83 ± 0.27 | 1.73 ± 0.19  | 65.51 ± 1.12 | 40.71 ± 1.12 | 0.66 ± 0.097 | 3.76 ± 0.34 | 16.11 ± 0.75 | 61.71 ± 0.59 | 855.1 ± 23.8 | 0.42 ± 0.085 | 2.14 ± 0.21  | 4.44 ± 0.33 | 5.58 ± 0.31  | 338.6 ± 10.2 | 61.72 ± 1.23 | 10.61 ± 0.32 | 2.38 ± 0.19 | 47.12 ± 1.51 | 6.69 ± 0.43 | 172.7 ± 7.5  | 31.82 ± 1.10 | 0.86 ± 0.024 | 69.5 ± 1.4 | 828 ± 18  | 1.14 ± 0.20   | 4.42 ± 0.24 | 1.29 ± 0.19 | 88.3 ± 2.1 |
| 7                    | W          | Aurore, Bianca Hibernat, Muscat | P               | 120   | w                                                  | 1.520 ± 0.089 | 906.1 ± 11.1 | 15.87 ± 0.25 | 5.51 ± 0.30  | 92.11 ± 1.71 | 48.62 ± 1.14 | 0.41 ± 0.081 | 3.79 ± 0.35 | 24.81 ± 0.87 | 20.62 ± 0.33 | 637.2 ± 20.8 | 0.42 ± 0.083 | 17.91 ± 0.45 | 6.09 ± 0.45 | 15.31 ± 0.43 | 791.7 ± 20.1 | 39.91 ± 1.34 | 13.5 ± 0.35  | 2.56 ± 0.20 | 26.55 ± 0.87 | 6.97 ± 0.43 | 321.1 ± 8.2  | 33.11 ± 1.15 | 0.65 ± 0.021 | 93.1 ± 1.8 | 890 ± 19  | 3.48 ± 0.34   | 3.32 ± 0.18 | 2.21 ± 0.23 | 85.5 ± 1.9 |
| 8                    | W          | Aurore, Bianca                  | P               | 120   | w                                                  | 1.390 ± 0.072 | 327.1 ± 8.8  | 13.02 ± 0.19 | 3.97 ± 0.26  | 64.83 ± 1.15 | 48.33 ± 1.19 | 0.27 ± 0.034 | 1.21 ± 0.19 | 22.84 ± 0.89 | 15.93 ± 0.31 | 482.4 ± 12.1 | 0.41 ± 0.084 | 8.52 ± 0.36  | 3.01 ± 0.32 | 8.47 ± 0.32  | 493.1 ± 13.1 | 43.25 ± 1.33 | 12.29 ± 0.27 | 2.15 ± 0.19 | 24.66 ± 0.89 | 4.17 ± 0.45 | 165.1 ± 7.1  | 31.84 ± 1.12 | 0.58 ± 0.018 | 100 ± 1.9  | 965 ± 20  | 0.329 ± 0.078 | 2.96 ± 0.16 | 1.55 ± 0.20 | 72.5 ± 1.8 |
| 9                    | W          | Hibernat, Bianca, Muller Turgau | KP              | 92    | w                                                  | 1.660 ± 0.088 | 577.1 ± 14.2 | 8.83 ± 0.17  | 1.96 ± 0.17  | 63.02 ± 1.17 | 34.92 ± 1.10 | 0.36 ± 0.039 | 1.08 ± 0.19 | 95.17 ± 1.23 | 769.1 ± 11.9 | 1324 ± 28    | 0.39 ± 0.079 | 2.77 ± 0.21  | 27.21 ± 1.0 | 7.38 ± 0.29  | 345.2 ± 10.4 | 174.7 ± 2.5  | 48.69 ± 1.12 | 1.86 ± 0.16 | 25.11 ± 0.83 | 2.33 ± 0.23 | 222.1 ± 7.9  | 30.18 ± 1.11 | 0.58 ± 0.018 | 115 ± 2.0  | 1410 ± 23 | 1.40 ± 0.22   | 4.65 ± 0.23 | 1.42 ± 0.17 | 95.2 ± 2.2 |
| 10                   | W          | Bianca                          | SC              | 320   | w                                                  | 1.170 ± 0.064 | 2059 ± 32    | 11.71 ± 0.19 | 25.42 ± 0.89 | 261.2 ± 4.9  | 33.85 ± 1.09 | 0.94 ± 0.19  | 5.47 ± 0.40 | 11.35 ± 0.50 | 63.44 ± 0.58 | 475.5 ± 11.9 | 0.38 ± 0.077 | 4.44 ± 0.24  | 9.57 ± 0.89 | 4.41 ± 0.26  | 3732 ± 39    | 78.27 ± 1.51 | 21.71 ± 0.54 | 1.73 ± 0.15 | 15.62 ± 0.65 | 3.11 ± 0.25 | 951.1 ± 11.2 | 38.99 ± 1.16 | 1.26 ± 0.23  | 104 ± 1.9  | 880 ± 20  | 1.42 ± 0.22   | 5.52 ± 0.27 | 3.50 ± 0.25 | 76.7 ± 1.9 |

| No <sub>sample</sub> | Grape Type | Region of Poland | Location [Masl] | Color | Metal Content (µg/L) or (mg/L) /Isotope Mass (amu) |               |              |              |              |              |              |              |             |              |              |              |              |              |              |             |              |              |              |              |              |             |              |              |              |            |           |               |               |             |            |
|----------------------|------------|------------------|-----------------|-------|----------------------------------------------------|---------------|--------------|--------------|--------------|--------------|--------------|--------------|-------------|--------------|--------------|--------------|--------------|--------------|--------------|-------------|--------------|--------------|--------------|--------------|--------------|-------------|--------------|--------------|--------------|------------|-----------|---------------|---------------|-------------|------------|
|                      |            |                  |                 |       | [µg/L]                                             |               |              |              |              |              |              |              |             |              |              |              |              |              |              |             | [mg/L]       |              |              |              |              |             |              |              |              |            |           |               |               |             |            |
|                      |            |                  |                 |       | Ag<br>107                                          | Al<br>27      | As<br>75     | Zr<br>90     | Ba<br>138    | Bi<br>209    | Cd<br>111    | Co<br>59     | Cr<br>52    | Cu<br>63     | Fe 56        | Hg<br>201    | V<br>51      | Li 7         | Mo 98        | Na 23       | Ni 60        | Pb<br>206    | Sb<br>121    | Se 78        | Sn<br>115    | Sr 88       | Ti 47        | Tl<br>205    | Mg<br>25     | K 41       | Mn 55     | B 10          | Zn<br>64      | Ca<br>40    |            |
| 11                   | W          | Hibernal         | SC              | 320   | w                                                  | 0.73 ± 0.056  | 1174 ± 20    | 12.97 ± 0.23 | 7.88 ± 0.39  | 190.4 ± 4.2  | 24.25 ± 1.08 | 1.56 ± 0.23  | 3.64 ± 0.34 | 13.41 ± 0.59 | 155.5 ± 2.3  | 456.2 ± 11.7 | 0.41 ± 0.089 | 4.75 ± 0.26  | 16.64 ± 1.20 | 5.35 ± 0.31 | 3823 ± 41    | 69.56 ± 1.43 | 27.85 ± 0.32 | 1.84 ± 0.17  | 12.82 ± 0.43 | 3.03 ± 0.25 | 401.4 ± 8.2  | 38.67 ± 1.15 | 0.97 ± 0.021 | 94.1 ± 1.7 | 1160 ± 21 | 1.49 ± 0.24   | 7.67 ± 0.32   | 3.89 ± 0.25 | 90.8 ± 2.1 |
| 12                   | W          | Hibernal         | SC              | 320   | w                                                  | 0.48 ± 0.055  | 2729 ± 22    | 22.75 ± 0.22 | 33.21 ± 0.78 | 182.1 ± 4.0  | 20.36 ± 1.11 | 0.89 ± 0.16  | 4.97 ± 0.39 | 24.83        | 126.1 ± 1.8  | 816.9 ± 25.8 | 0.39 ± 0.077 | 25.89 ± 0.49 | 13.02 ± 0.78 | 4.87 ± 0.30 | 3421 ± 42    | 142.9 ± 2.4  | 26.47 ± 0.24 | 1.57 ± 0.14  | 11.47 ± 0.39 | 1.56 ± 0.13 | 867.7 ± 12.2 | 43.41 ± 1.19 | 1.03 ± 0.029 | 92.1 ± 1.8 | 188 ± 2.3 | 1.41 ± 0.21   | 9.93 ± 0.36   | 5.71 ± 0.30 | 75.5 ± 1.8 |
| 13                   | W          | Hibernal         | SC              | 296   | w                                                  | 1.840 ± 0.091 | 56.66 ± 1.91 | 3.11 ± 0.10  | 1.21 ± 0.12  | 43.31 ± 1.09 | 1.71 ± 0.091 | 0.51 ± 0.091 | <0.002      | 7.12 ± 0.27  | 25000 ± 29   | 155.8 ± 2.8  | 0.43 ± 0.091 | 0.37 ± 0.14  | 1.13 ± 0.20  | 1.01 ± 0.19 | 99.94 ± 1.81 | 0.21 ± 0.012 | 23.24 ± 0.30 | 0.56 ± 0.012 | 6.79 ± 0.37  | <0.021      | 49.7 ± 1.2   | 24.61 ± 1.10 | 0.54 ± 0.017 | 123 ± 2.2  | 1540 ± 23 | 0.018 ± 0.007 | 0.333 ± 0.019 | 2.34 ± 0.21 | 137        |
| 14                   | W          | Hibernal         | LP              | 335   | w                                                  | 0.590 ± 0.046 | 1127 ± 19    | 9.41 ± 0.24  | 2.22 ± 0.19  | 187.1 ± 4.3  | 24.51 ± 1.10 | 0.44 ± 0.078 | 2.86 ± 0.32 | 13.61 ± 0.56 | 98.21 ± 0.98 | 331.8 ± 4.5  | 0.37 ± 0.081 | 20.19 ± 0.47 | 8.69 ± 0.67  | 5.99 ± 0.27 | 2491 ± 29    | 23.11 ± 1.12 | 18.16 ± 0.21 | 1.06 ± 0.021 | 6.93 ± 0.40  | 2.22 ± 0.22 | 503.4 ± 4.2  | 31.02 ± 1.14 | 1.15 ± 0.23  | 42.7 ± 1.3 | 1130 ± 21 | 0.99 ± 0.17   | 5.89 ± 0.34   | 9.89 ± 0.67 | 42.9 ± 1.3 |
| 15                   | W          | Jutrzenka        | M               | 151   | w                                                  | 0.610 ± 0.041 | 387.1 ± 9.2  | 5.75 ± 0.28  | 3.81 ± 0.28  | 202.4 ± 4.2  | 25.31 ± 1.09 | 0.65 ± 0.095 | 1.26 ± 0.26 | 6.11 ± 0.22  | 436.1 ± 11.5 | 407.1 ± 11.8 | 0.38 ± 0.080 | 7.5 ± 0.34   | 2.47 ± 0.28  | 2.73 ± 0.23 | 169.3 ± 7.8  | 50.91 ± 1.32 | 43.85 ± 0.43 | 1.79 ± 0.11  | 10.81 ± 0.32 | 2.71 ± 0.23 | 150.6 ± 5.1  | 29.12 ± 1.11 | 0.67 ± 0.020 | 84.2 ± 1.5 | 1090 ± 20 | 1.57 ± 0.25   | 1.44 ± 0.17   | 5.66 ± 0.30 | 72.4 ± 1.8 |
| 16                   | W          | Jutrzenka        | M               | 151   | w                                                  | 0.390 ± 0.039 | 427.1 ± 9.6  | 3.47 ± 0.19  | 1.55 ± 0.18  | 174.4 ± 3.7  | 20.92 ± 1.11 | 0.51 ± 0.091 | 1.36 ± 0.27 | 4.86 ± 0.22  | 29.47 ± 0.34 | 680.3 ± 23.8 | 0.35 ± 0.067 | 1.67 ± 0.11  | 3.65 ± 0.32  | 4.57 ± 0.32 | 110.4 ± 3.2  | 10.19 ± 1.01 | 6.14 ± 0.29  | 0.87 ± 0.021 | 5.56 ± 0.25  | 1.58 ± 0.18 | 143.1 ± 2.4  | 26.82 ± 1.10 | 0.65 ± 0.021 | 88.9 ± 1.6 | 817 ± 19  | 2.26 ± 0.27   | 2.57 ± 0.19   | 3.05 ± 0.25 | 78.5 ± 1.6 |

| No <sub>sample</sub> | Grape Type | Region of Poland               | Location [Masl] | Color | Metal Content (µg/L) or (mg/L) /Isotope Mass (amu) |              |              |             |             |              |              |                     |             |              |              |              |              |              |             |             |              |              |              |              |              |              |             |              |              |            |           |             |             |             |            |
|----------------------|------------|--------------------------------|-----------------|-------|----------------------------------------------------|--------------|--------------|-------------|-------------|--------------|--------------|---------------------|-------------|--------------|--------------|--------------|--------------|--------------|-------------|-------------|--------------|--------------|--------------|--------------|--------------|--------------|-------------|--------------|--------------|------------|-----------|-------------|-------------|-------------|------------|
|                      |            |                                |                 |       | [µg/L]                                             |              |              |             |             |              |              |                     |             |              |              |              |              |              |             |             |              |              |              |              | [mg/L]       |              |             |              |              |            |           |             |             |             |            |
|                      |            |                                |                 |       | Ag 107                                             | Al 27        | As 75        | Zr 90       | Ba 138      | Bi 209       | Cd 111       | Co 59               | Cr 52       | Cu 63        | Fe 56        | Hg 201       | V 51         | Li 7         | Mo 98       | Na 23       | Ni 60        | Pb 206       | Sb 121       | Se 78        | Sn 115       | Sr 88        | Ti 47       | Tl 205       | Mg 25        | K 41       | Mn 55     | B 10        | Zn 64       | Ca 40       |            |
| 17                   | W          | Aurora, Bianca                 | M               | 151   | w                                                  | 0.39 ± 0.038 | 342.1 ± 9.1  | 5.84 ± 0.33 | 3.11 ± 0.23 | 181.4 ± 4.1  | 17.11 ± 1.08 | 1.21 ± 0.21 ± 0.034 | 2.12 ± 0.31 | 11.77 ± 0.50 | 127.5 ± 1.7  | 761.2 ± 23.9 | 0.36 ± 0.078 | 8.76 ± 0.31  | 4.16 ± 0.34 | 2.27 ± 0.23 | 480.1 ± 10.1 | 62.38 ± 1.51 | 19.61 ± 0.33 | 0.98 ± 0.019 | 11.72 ± 0.43 | 1.37 ± 0.12  | 282.1 ± 7.9 | 27.42 ± 1.00 | 0.55 ± 0.018 | 106 ± 1.9  | 862 ± 14  | 2.07 ± 0.24 | 1.88 ± 0.16 | 3.28 ± 0.21 | 87.2 ± 1.9 |
| 18                   | W          | Aurora, Bianca                 | M               | 151   | w                                                  | 0.31 ± 0.037 | 232.1 ± 7.8  | 4.11 ± 0.22 | 1.48 ± 0.11 | 117.3 ± 2.3  | 14.41 ± 1.07 | 1.09 ± 0.16         | 1.46 ± 0.27 | 8.63 ± 0.26  | <0.268       | 290.2 ± 3.2  | 0.36 ± 0.075 | 7.46 ± 0.27  | 2.74 ± 0.29 | 2.04 ± 0.22 | 33.63 ± 0.69 | 35.71 ± 1.41 | 13.91 ± 0.22 | 0.78 ± 0.016 | 5.78 ± 0.21  | 0.84 ± 0.023 | 279.2 ± 7.7 | 30.12 ± 1.13 | 0.6 ± 0.019  | 161 ± 2.5  | 1390 ± 24 | 2.45 ± 0.27 | 3.24 ± 0.22 | 3.81 ± 0.26 | 122        |
| 19                   | W          | La Crescent                    | M               | 151   | w                                                  | 0.56 ± 0.041 | 402.2 ± 9.8  | 3.91 ± 0.19 | 1.41 ± 0.10 | 230.7 ± 4.7  | 14.27 ± 1.01 | 2.11 ± 0.30         | 2.82 ± 0.35 | 6.77 ± 0.31  | 226.1 ± 3.2  | 476.1 ± 11.5 | 0.36 ± 0.075 | 1.92 ± 0.11  | 1.03 ± 0.20 | 5.03 ± 0.29 | 77.74 ± 1.13 | 21.41 ± 1.14 | 6.21 ± 0.23  | 0.61 ± 0.014 | 3.94 ± 0.19  | 0.87 ± 0.045 | 280.2 ± 7.4 | 33.71 ± 1.15 | 1.06 ± 0.13  | 156 ± 2.5  | 985 ± 19  | 7.70 ± 0.48 | 4.00 ± 0.20 | 4.77 ± 0.29 | 95.4 ± 2.2 |
| 20                   | W          | La Crescent, St. Pepin         | M               | 151   | w                                                  | 0.29 ± 0.028 | 226.2 ± 7.6  | 4.04 ± 0.20 | 1.18 ± 0.10 | 186.4 ± 4.2  | 10.68 ± 1.02 | 3.73 ± 0.36         | 2.12 ± 0.32 | 5.46 ± 0.27  | 164.4 ± 2.8  | 361.2 ± 2.9  | 0.35 ± 0.072 | 0.88 ± 0.023 | 0.58 ± 0.14 | 2.99 ± 0.24 | 39.29 ± 0.39 | 32.61 ± 1.31 | 6.87 ± 0.19  | 0.51 ± 0.013 | 4.99 ± 0.32  | 0.72 ± 0.046 | 289.1 ± 7.4 | 31.51 ± 1.12 | 0.87 ± 0.016 | 69.3 ± 1.5 | 901 ± 17  | 6.84 ± 0.46 | 3.97 ± 0.21 | 6.65 ± 0.33 | 55 ± 1.5   |
| 21                   | W          | Andaluzna, Krasny, Pear & Star | M               | 151   | w                                                  | 0.13 ± 0.006 | 559.9 ± 11.8 | 6.12 ± 0.26 | 3.97 ± 0.27 | 156.1 ± 3.2  | 7.19 ± 0.67  | 0.91 ± 0.15         | 1.04 ± 0.15 | 4.75 ± 0.22  | 47.31 ± 0.50 | 469.3 ± 11.9 | 0.35 ± 0.073 | 19.77 ± 0.46 | 3.07 ± 0.29 | 4.61 ± 0.36 | 188.9 ± 7.8  | 33.84 ± 1.36 | 13.81 ± 0.34 | 0.62 ± 0.016 | 10.11 ± 0.87 | 0.57 ± 0.032 | 170.5 ± 6.2 | 27.95 ± 1.11 | 0.61 ± 0.014 | 62.5 ± 1.4 | 166 ± 2   | 2.46 ± 0.29 | 2.30 ± 0.17 | 2.54 ± 0.21 | 43.9 ± 1.3 |
| 22                   | W          | Andaluzna, Krasny              | M               | 151   | w                                                  | 0.19 ± 0.009 | 133.1 ± 4.8  | 3.38 ± 0.21 | 3.15 ± 0.23 | 70.42 ± 1.16 | 7.35 ± 0.62  | 0.62 ± 0.097        | 1.19 ± 0.17 | 5.33 ± 0.25  | 496.1 ± 12.3 | 267.9 ± 2.8  | 0.34 ± 0.070 | 0.56 ± 0.027 | 5.65 ± 0.34 | 1.78 ± 0.19 | 67.68 ± 1.11 | 244.9 ± 2.9  | 40.21 ± 0.43 | 0.57 ± 0.017 | 3.34 ± 0.23  | 0.22 ± 0.021 | 89.81       | 30.26 ± 1.16 | 0.61 ± 0.016 | 66.5 ± 1.6 | 1330 ± 23 | 2.36 ± 0.27 | 3.73 ± 0.24 | 3.17 ± 0.25 | 32 ± 11    |

| No <sub>sample</sub> | Grape Type | Region of Poland      | Location [Masl] | Color | Metal Content (µg/L) or (mg/L) /Isotope Mass (amu) |              |             |             |              |              |             |              |             |             |              |              |              |               |              |              |              |              |              |              |             |               |             |              |              |            |           |             |             |             |            |
|----------------------|------------|-----------------------|-----------------|-------|----------------------------------------------------|--------------|-------------|-------------|--------------|--------------|-------------|--------------|-------------|-------------|--------------|--------------|--------------|---------------|--------------|--------------|--------------|--------------|--------------|--------------|-------------|---------------|-------------|--------------|--------------|------------|-----------|-------------|-------------|-------------|------------|
|                      |            |                       |                 |       | [µg/L]                                             |              |             |             |              |              |             |              |             |             |              |              |              |               |              |              |              |              |              |              | [mg/L]      |               |             |              |              |            |           |             |             |             |            |
|                      |            |                       |                 |       | Ag<br>107                                          | Al<br>27     | As<br>75    | Zr<br>90    | Ba<br>138    | Bi<br>209    | Cd<br>111   | Co<br>59     | Cr<br>52    | Cu<br>63    | Fe 56        | Hg<br>201    | V<br>51      | Li 7          | Mo 98        | Na 23        | Ni 60        | Pb<br>206    | Sb<br>121    | Se 78        | Sn<br>115   | Sr 88         | Ti 47       | Tl<br>205    | Mg<br>25     | K 41       | Mn 55     | B 10        | Zn<br>64    | Ca<br>40    |            |
| 23                   | W          | Seyval Blanc          | M               | 151   | w                                                  | 0.16 ± 0.005 | 1589 ± 19.8 | 3.63 ± 0.23 | 3.34 ± 0.24  | 113.4 ± 2.4  | 9.01 ± 0.71 | 1.14 ± 0.16  | 1.99 ± 0.26 | 8.72 ± 0.34 | 83.71 ± 1.91 | 826.1 ± 23.8 | 0.34 ± 0.072 | 5.09 ± 0.31   | 8.09 ± 0.45  | 2.29 ± 0.21  | 463.1 ± 14.9 | 149.9 ± 2.4  | 17.28 ± 0.41 | 0.77 ± 0.018 | 4.47 ± 0.28 | 0.74 ± 0.034  | 211.1 ± 7.0 | 30.14 ± 1.11 | 0.56 ± 0.020 | 59.4 ± 1.5 | 1020 ± 22 | 1.47 ± 0.20 | 1.78 ± 0.15 | 3.45 ± 0.27 | 58.8 ± 1.4 |
| 24                   | W          | St.Pépin, La Crescent | M               | 151   | w                                                  | 0.23 ± 0.011 | 91.61 ± 3.5 | 3.21 ± 0.19 | 1.08 ± 0.10  | 152.5 ± 2.7  | 7.17 ± 0.79 | 2.54 ± 0.32  | 1.17 ± 0.21 | 5.75 ± 0.29 | 400.2 ± 11.5 | 261.2 ± 3.1  | 0.35 ± 0.073 | 0.47 ± 0.23   | 0.53 ± 0.30  | 2.27 ± 0.20  | 5.33 ± 0.49  | 17.65 ± 1.19 | 6.77 ± 0.19  | 0.39 ± 0.012 | 4.35 ± 0.27 | <0.021        | 196.1 ± 6.5 | 33.53 ± 1.14 | 0.72 ± 0.019 | 130 ± 2.5  | 1220 ± 27 | 3.94 ± 0.32 | 6.35 ± 0.39 | 4.96 ± 0.29 | 74.1 ± 1.8 |
| 1R                   |            | Allegro               | W<br>P          | 125   | r                                                  | 0.06 ± 0.003 | 415.1 ± 9.8 | 4.79 ± 0.23 | 1.22 ± 0.11  | 266.3 ± 4.9  | 2.51 ± 0.22 | 0.55 ± 0.091 | 1.81 ± 0.26 | 6.98 ± 0.32 | 47.03 ± 0.51 | 711.2 ± 21.8 | 0.34 ± 0.080 | 4.28 ± 0.26   | 15.37 ± 1.20 | 2.04 ± 0.22  | 3805 ± 45    | 35.17 ± 1.29 | 54.16 ± 0.43 | 0.34 ± 0.011 | 2.91 ± 0.19 | 0.136 ± 0.018 | 391.4 ± 5.2 | 32.71 ± 1.15 | 0.99 ± 0.019 | 82.9 ± 1.7 | 960 ± 14  | 2.78 ± 0.28 | 5.92 ± 0.25 | 1.66 ± 0.12 | 55.6 ± 1.5 |
| 2R                   |            | Regent, Rondo         | W<br>P          | 125   | r                                                  | 0.04 ± 0.001 | 276.1 ± 6.8 | 4.72 ± 0.23 | 1.09 ± 0.099 | 303.5 ± 5.2  | 2.39 ± 0.24 | 0.83 ± 0.14  | 1.91 ± 0.27 | 5.89 ± 0.31 | 10.51 ± 0.24 | 311.1 ± 2.9  | 0.34 ± 0.075 | 0.61 ± 0.023  | 6.48 ± 0.67  | 0.59 ± 0.034 | 3287 ± 42    | 29.11 ± 1.25 | 55.55 ± 0.43 | 0.26 ± 0.011 | 3.06 ± 0.21 | <0.021        | 488.1 ± 6.2 | 35.41 ± 1.14 | 0.82 ± 0.017 | 108 ± 1.9  | 1190 ± 19 | 2.64 ± 0.26 | 4.90 ± 0.22 | 4.19 ± 0.30 | 50.4 ± 1.3 |
| 3R                   |            | Rondo                 | KP              | 74    | r                                                  | 3.85 ± 0.14  | 146.2 ± 7.8 | 3.62 ± 0.19 | 1.01 ± 0.11  | 95.41 ± 1.21 | 3.03 ± 0.23 | 0.42 ± 0.087 | 2.39 ± 0.32 | 7.15 ± 0.34 | <0.268       | 290.4 ± 2.8  | 0.35 ± 0.069 | 0.03 ± 0.0021 | 9.33 ± 0.61  | 0.31 ± 0.021 | 311.1 ± 10.1 | 66.51 ± 1.51 | 12.12 ± 0.32 | 0.17 ± 0.011 | 3.75 ± 0.23 | <0.021        | 212.1 ± 7.0 | 28.51 ± 1.00 | 0.76 ± 0.019 | 95.5 ± 1.7 | 1820 ± 34 | 1.56 ± 0.21 | 6.31 ± 0.38 | 4.87 ± 0.31 | 60 ± 1.6   |
| 4R                   |            | Regent                | KP              | 74    | r                                                  | 0.03 ± 0.003 | 131.3 ± 4.8 | 3.47 ± 0.24 | 0.98 ± 0.034 | 79.31 ± 1.18 | 2.72 ± 0.20 | 0.39 ± 0.076 | 1.62 ± 0.25 | 6.54 ± 0.29 | 27.61 ± 0.34 | 268.1 ± 2.7  | 0.33 ± 0.068 | <0.003        | 5.18 ± 0.59  | 0.58 ± 0.026 | 308.1 ± 10.8 | 49.31 ± 1.45 | 7.69 ± 0.19  | 0.14 ± 0.010 | 4.68 ± 0.32 | <0.021        | 164.1 ± 6.5 | 28.32 ± 1.09 | 0.78 ± 0.020 | 98.9 ± 1.8 | 2050 ± 28 | 1.20 ± 0.16 | 5.98 ± 0.24 | 3.68 ± 0.27 | 56.6 ± 1.5 |

| No <sub>sample</sub> | Grape Type             | Region of Poland | Location [Mas] | Color | Metal Content (µg/L) or (mg/L) /Isotope Mass (amu) |              |             |             |              |             |              |              |              |              |              |              |              |              |              |              |              |              |              |              |        |             |              |              |            |           |               |             |             |            |
|----------------------|------------------------|------------------|----------------|-------|----------------------------------------------------|--------------|-------------|-------------|--------------|-------------|--------------|--------------|--------------|--------------|--------------|--------------|--------------|--------------|--------------|--------------|--------------|--------------|--------------|--------------|--------|-------------|--------------|--------------|------------|-----------|---------------|-------------|-------------|------------|
|                      |                        |                  |                |       | [µg/L]                                             |              |             |             |              |             |              |              |              |              |              |              |              |              |              |              |              |              |              |              | [mg/L] |             |              |              |            |           |               |             |             |            |
|                      |                        |                  |                |       | Ag                                                 | Al           | As          | Zr          | Ba           | Bi          | Cd           | Co           | Cr           | Cu           | Fe 56        | Hg           | V            | Li 7         | Mo 98        | Na 23        | Ni 60        | Pb           | Sb           | Se 78        | Sn     | Sr 88       | Ti 47        | Tl           | Mg         | K 41      | Mn 55         | B 10        | Zn          | Ca         |
|                      |                        |                  |                |       | 107                                                | 27           | 75          | 90          | 138          | 209         | 111          | 59           | 52           | 63           |              | 201          | 51           |              |              |              |              | 206          | 121          |              | 115    |             |              | 205          | 25         |           |               |             | 64          | 40         |
| 5R                   | Regent                 | P                | 120            | r     | 0.03 ± 0.002                                       | 201.1 ± 10.8 | 3.77 ± 0.23 | 1.39 ± 0.11 | 85.35 ± 1.20 | 3.63 ± 0.21 | 0.24 ± 0.056 | 0.87 ± 0.067 | 17.87 ± 0.75 | <0.268       | 444.5 ± 12.3 | 0.33 ± 0.073 | 1.19 ± 0.11  | 2.31 ± 0.29  | 4.47 ± 0.28  | 219.1 ± 7.9  | 35.22 ± 1.23 | 11.61 ± 0.17 | 0.15 ± 0.011 | 2.58 ± 0.25  | <0.021 | 225.5 ± 7.9 | 30.07 ± 1.12 | 0.51 ± 0.013 | 78.4 ± 1.6 | 1980 ± 19 | 0.405 ± 0.091 | 5.34 ± 0.27 | 6.27 ± 0.34 | 78.2 ± 1.8 |
| 6R                   | Pinot Noir.            | KP               | 92             | r     | 0.07 ± 0.004                                       | 292.1 ± 7.9  | 3.38 ± 0.22 | 1.25 ± 0.10 | 76.87 ± 1.12 | 3.03 ± 0.26 | 0.23 ± 0.051 | 0.45 ± 0.043 | 7.99 ± 0.34  | <0.268       | 745.6 ± 23.8 | 0.33 ± 0.076 | 0.48 ± 0.12  | 34.01 ± 1.20 | 4.96 ± 0.429 | 460.4 ± 16.4 | 13.61 ± 1.16 | 9.61 ± 0.17  | 0.28 ± 0.013 | 12.85 ± 0.87 | <0.021 | 297.1 ± 7.8 | 27.11 ± 1.07 | 0.63 ± 0.017 | 74 ± 1.5   | 1740 ± 30 | 1.51 ± 0.22   | 8.31 ± 0.39 | 3.63 ± 0.26 | 86.3 ± 1.9 |
| 7R                   | Rondo                  | SC               | 320            | r     | 0.02 ± 0.001                                       | 462.1 ± 10.2 | 7.63 ± 0.43 | 4.02 ± 0.27 | 300.3 ± 5.1  | 2.19 ± 0.19 | 0.68 ± 0.097 | 3.25 ± 0.33  | 15.41 ± 0.70 | 77.82 ± 0.64 | 1232 ± 31    | 0.34 ± 0.071 | 5.09 ± 0.24  | 12.16 ± 0.67 | 3.26 ± 0.26  | 2393 ± 29    | 139.9 ± 2.4  | 13.02 ± 0.21 | 0.41 ± 0.015 | 3.74 ± 0.34  | <0.021 | 1389 ± 12.2 | 30.91 ± 1.14 | 0.85 ± 0.019 | 106 ± 1.9  | 2020 ± 31 | 2.62 ± 0.27   | 11.8 ± 0.52 | 2.10 ± 0.21 | 81.6 ± 1.9 |
| 8R                   | Regent                 | SC               | 320            | r     | 0.02 ± 0.002                                       | 680.7 ± 17.8 | 9.08 ± 0.37 | 2.16 ± 0.26 | 285.1 ± 4.9  | 1.84 ± 0.17 | 0.71 ± 0.099 | 2.78 ± 0.33  | 11.92 ± 0.49 | 15.63 ± 0.34 | 527.2 ± 13.0 | 0.33 ± 0.070 | 8.06 ± 0.29  | 18.91 ± 0.56 | 1.09 ± 0.099 | 2042 ± 30    | 132.5 ± 2.1  | 14.35 ± 0.22 | 0.29 ± 0.013 | 2.74 ± 0.23  | <0.021 | 826.5 ± 8.9 | 28.55 ± 1.05 | 1.31 ± 0.13  | 106 ± 2.0  | 1670 ± 19 | 2.84 ± 0.28   | 12.1 ± 0.51 | 2.29 ± 0.19 | 66.4 ± 1.6 |
| 9R                   | Marchal Feob. Lora MBR | M                | 224            | r     | 0.02 ± 0.001                                       | 345.5 ± 9.6  | 3.83 ± 0.17 | 1.77 ± 0.18 | 151.1 ± 3.2  | 1.27 ± 0.12 | 0.67 ± 0.095 | 2.52 ± 0.30  | 6.36 ± 0.28  | <0.268       | 1064 ± 30    | 0.32 ± 0.068 | 2.89 ± 0.21  | 2.97 ± 0.29  | 0.98 ± 0.078 | 323.1 ± 10.2 | 81.61 ± 1.65 | 16.54 ± 0.20 | 0.14 ± 0.011 | 3.42 ± 0.30  | <0.021 | 526.5 ± 6.2 | 28.16 ± 1.05 | 1.29 ± 0.18  | 106 ± 1.9  | 2050 ± 28 | 0.952 ± 0.20  | 11.9 ± 0.49 | 5.57 ± 0.30 | 78.3 ± 1.8 |
| 10R                  | Frontenac              | M                | 151            | r     | 0.05 ± 0.003                                       | 806.6 ± 22.8 | 7.45 ± 0.25 | 2.55 ± 0.21 | 514.1 ± 12.3 | 4.04 ± 0.21 | 1.22 ± 0.18  | 2.42 ± 0.29  | 6.57 ± 0.26  | <0.268       | 1002 ± 29    | 0.33 ± 0.069 | 19.21 ± 0.45 | 1.61 ± 0.20  | 3.71 ± 0.37  | 279.1 ± 9.8  | 63.42 ± 1.49 | 16.97 ± 0.19 | 0.48 ± 0.014 | 4.57 ± 0.34  | <0.021 | 405.8 ± 6.2 | 28.51 ± 1.11 | 0.58 ± 0.023 | 91.4 ± 1.8 | 1630 ± 21 | 4.560 ± 0.35  | 4.49 ± 0.21 | 2.21 ± 0.17 | 105 ± 2.5  |

| No <sub>sample</sub> | Grape Type | Region of Poland        | Location [Masl] | Color | Metal Content (µg/L) or (mg/L) /Isotope Mass (amu) |               |              |             |              |              |              |              |              |              |              |              |              |              |              |              |              |               |              |              |             |              |             |              |              |            |            |             |             |               |            |
|----------------------|------------|-------------------------|-----------------|-------|----------------------------------------------------|---------------|--------------|-------------|--------------|--------------|--------------|--------------|--------------|--------------|--------------|--------------|--------------|--------------|--------------|--------------|--------------|---------------|--------------|--------------|-------------|--------------|-------------|--------------|--------------|------------|------------|-------------|-------------|---------------|------------|
|                      |            |                         |                 |       | [µg/L]                                             |               |              |             |              |              |              |              |              |              |              |              |              |              |              |              |              |               |              |              | [mg/L]      |              |             |              |              |            |            |             |             |               |            |
|                      |            |                         |                 |       | Ag                                                 | Al            | As           | Zr          | Ba           | Bi           | Cd           | Co           | Cr           | Cu           | Fe 56        | Hg           | V            | Li 7         | Mo 98        | Na 23        | Ni 60        | Pb            | Sb           | Se 78        | Sn          | Sr 88        | Ti 47       | Tl           | Mg           | K 41       | Mn 55      | B 10        | Zn          | Ca            |            |
|                      |            |                         |                 |       | 107                                                | 27            | 75           | 90          | 138          | 209          | 111          | 59           | 52           | 63           |              | 201          | 51           |              |              |              |              | 206           | 121          |              | 115         |              |             | 205          | 25           |            |            |             | 64          | 40            |            |
| 11                   | R          | Frontenac               | M               | 151   | r                                                  | 0.04 ± 0.001  | 217.7 ± 4.8  | 6.41 ± 0.27 | 0.99 ± 0.056 | 373.1 ± 9.3  | 3.11 ± 0.20  | 0.73 ± 0.097 | 0.42 ± 0.054 | 4.62 ± 0.22  | 404.1 ± 11.9 | 715.1 ± 23.1 | 0.34 ± 0.074 | 0.11 ± 0.01  | 0.57 ± 0.11  | 3.25 ± 0.30  | 16.02 ± 1.11 | 33.31 ± 1.21  | 79.16 ± 0.79 | 0.32 ± 0.013 | 2.83 ± 0.28 | <0.021       | 420.8 ± 6.1 | 27.32 ± 1.09 | 0.62 ± 0.021 | 99.2 ± 1.7 | 2100 ± 34  | 3.81 ± 0.31 | 6.03 ± 0.27 | 4.52 ± 0.27   | 96.3 ± 2.4 |
| 12                   | R          | Regent                  | M               | 151   | r                                                  | 0.02 ± 0.0005 | 110.4 ± 3.1  | 1.93±0.12   | 1.08 ± 0.097 | 206.2 ± 4.2  | 2.51 ± 0.10  | 0.42 ± 0.061 | 0.22 ± 0.021 | 3.74 ± 0.20  | <0.268       | 584.7 ± 17.8 | 0.33 ± 0.059 | <0.003       | 1.97 ± 0.18  | 0.31 ± 0.021 | 118.3 ± 2.8  | 18.46 ± 1.129 | 8.97 ± 0.49  | 0.11 ± 0.010 | 1.31 ± 0.17 | <0.021       | 262.1 ± 7.9 | 25.13 ± 1.04 | 0.63±0.020   | 96.5±1.9   | 1500 ± 19  | 2.22 ± 0.29 | 2.54 ± 0.19 | 0.87 ± 0.034  | 53.9 ± 1.5 |
| 13                   | R          | Regent, Frontenac       | M               | 151   | r                                                  | 0.17 ± 0.005  | 341.2 ± 7.2  | 2.43 ± 0.14 | 1.03 ± 0.067 | 307.3 ± 5.2  | 2.03 ± 0.14  | 0.66 ± 0.091 | 1.58 ± 0.26  | 8.31 ± 0.40  | 91.91 ± 1.34 | 861.9 ± 23.8 | 0.33 ± 0.067 | 0.43 ± 0.013 | 2.18 ± 0.20  | 5.26 ± 0.40  | 152.4 ± 7.4  | 73.99 ± 1.51  | 7.62 ± 0.54  | 0.25 ± 0.012 | 2.12 ± 0.19 | <0.021       | 265.1 ± 7.6 | 27.21 ± 1.02 | 0.62 ± 0.023 | 140 ± 2.5  | 2380 ± 40  | 4.62 ± 0.42 | 4.31 ± 0.25 | 0.29 ± 0.011  | 83.5 ± 1.8 |
| 14                   | R          | Heridian                | M               | 151   | r                                                  | 0.06 ± 0.0008 | 294.6 ± 5.8  | 4.49 ± 0.17 | 1.86 ± 0.11  | 746.3 ± 14.5 | 7.32 ± 0.71  | 0.62 ± 0.090 | 0.44 ± 0.056 | 10.81 ± 0.55 | 475.1 ± 12.5 | 752.8 ± 21.8 | 0.31 ± 0.059 | 0.25 ± 0.011 | 0.42 ± 0.056 | 4.64 ± 0.37  | 12.21 ± 1.09 | 61.24 ± 1.47  | 46.11 ± 0.43 | 0.83 ± 0.016 | 3.67 ± 0.26 | 0.81 ± 0.012 | 560.5 ± 8.2 | 26.24 ± 1.09 | 0.64 ± 0.019 | 139 ± 2.4  | 2240 ± 37  | 9.22 ± 0.56 | 7.20 ± 0.32 | 0.38 ± 0.009  | 98.2 ± 1.9 |
| 15                   | R          | Leon MBB, Maschal, Rob. | M               | 151   | r                                                  | <0.001        | 530.8 ± 17.8 | 5.52 ± 0.25 | 2.12 ± 0.15  | 507.1 ± 13.2 | 1.07 ± 0.10  | 0.51 ± 0.091 | 1.53 ± 0.25  | 7.64 ± 0.38  | 41.81 ± 0.49 | 482.8 ± 11.8 | 0.31 ± 0.057 | 7.81±0.37    | 1.55 ± 0.21  | 1.74 ± 0.21  | 138.3 ± 7.1  | 42.51 ± 1.42  | 22.21 ± 0.36 | 0.24 ± 0.011 | 4.33 ± 0.34 | <0.021       | 472.2 ± 7.4 | 24.55 ± 1.04 | 0.71 ± 0.023 | 98.2 ± 1.9 | 97.1 ± 1.9 | 3.94 ± 0.32 | 3.83 ± 0.23 | 0.121 ± 0.024 | 72.1 ± 1.7 |
| 16                   | R          | MBB, Leon               | M               | 151   | r                                                  | <0.001        | 104.1 ± 4.3  | 3.54 ± 0.23 | 0.98 ± 0.045 | 593.1 ± 13.3 | 0.42 ± 0.011 | 0.44 ± 0.071 | 0.68 ± 0.067 | 3.56 ± 0.20  | 42.44 ± 0.50 | 782.5 ± 23.8 | 0.31 ± 0.064 | <0.003       | 0.95 ± 0.040 | 0.86 ± 0.021 | 19.15 ± 1.00 | 32.82 ± 1.32  | 34.71 ± 0.21 | 0.12 ± 0.010 | 4.02 ± 0.36 | <0.021       | 700.3 ± 8.2 | 28.35 ± 1.11 | 0.71 ± 0.024 | 106 ± 1.9  | 2840 ± 39  | 4.32 ± 0.35 | 7.05 ± 0.40 | 0.399 ± 0.034 | 93.2 ± 2.0 |

| No <sub>sample</sub> | Grape Type            | Region of Poland | Location [Mas] | Color | Metal Content (µg/L) or (mg/L) /Isotope Mass (amu) |              |             |              |              |              |              |              |              |              |              |              |             |              |              |              |              |              |              |              |        |             |              |              |            |           |             |             |               |            |
|----------------------|-----------------------|------------------|----------------|-------|----------------------------------------------------|--------------|-------------|--------------|--------------|--------------|--------------|--------------|--------------|--------------|--------------|--------------|-------------|--------------|--------------|--------------|--------------|--------------|--------------|--------------|--------|-------------|--------------|--------------|------------|-----------|-------------|-------------|---------------|------------|
|                      |                       |                  |                |       | [µg/L]                                             |              |             |              |              |              |              |              |              |              |              |              |             |              |              |              |              |              |              |              |        |             | [mg/L]       |              |            |           |             |             |               |            |
|                      |                       |                  |                |       | Ag 107                                             | Al 27        | As 75       | Zr 90        | Ba 138       | Bi 209       | Cd 111       | Co 59        | Cr 52        | Cu 63        | Fe 56        | Hg 201       | V 51        | Li 7         | Mo 98        | Na 23        | Ni 60        | Pb 206       | Sb 121       | Se 78        | Sn 115 | Sr 88       | Ti 47        | Tl 205       | Mg 25      | K 41      | Mn 55       | B 10        | Zn 64         | Ca 40      |
| 17                   | Rondo<br>Maschal      | M                | 151            | r     | <0.001                                             | 336.1 ± 12.1 | 2.18 ± 0.19 | 1.15 ± 0.13  | 474.1 ± 12.5 | 1.35 ± 0.091 | 0.93 ± 0.16  | 1.83 ± 0.28  | 4.37 ± 0.22  | 35.47 ± 0.46 | 791.5 ± 25.9 | 0.32 ± 0.065 | <0.003      | 4.12 ± 0.32  | 1.46 ± 0.20  | 90.12 ± 2.13 | 30.34 ± 1.26 | 8.79 ± 0.19  | 0.11 ± 0.010 | 1.51 ± 0.21  | <0.021 | 522.1 ± 8.0 | 27.21 ± 1.11 | 0.72 ± 0.020 | 134 ± 2.3  | 3170 ± 51 | 7.07 ± 0.45 | 5.16 ± 0.24 | 0.449 ± 0.31  | 86.6 ± 1.9 |
| 18                   | St. Croix, Słobowicki | M                | 151            | r     | <0.001                                             | 109.1 ± 2.2  | 2.91 ± 0.17 | 0.93 ± 0.089 | 478.1 ± 12.3 | 0.17 ± 0.010 | 0.32 ± 0.045 | 0.16 ± 0.019 | 4.01 ± 0.21  | 13.69 ± 0.84 | 249.1 ± 2.8  | 0.31 ± 0.060 | <0.003      | 4.11 ± 0.40  | 0.41 ± 0.018 | 98.48 ± 2.43 | 23.55 ± 1.17 | 11.31 ± 0.17 | 0.16 ± 0.013 | 1.55 ± 0.12  | <0.021 | 478.1 ± 6.2 | 25.72 ± 1.06 | 0.76 ± 0.022 | 115 ± 2.1  | 3250 ± 54 | 5.13 ± 0.43 | 6.60 ± 0.30 | 0.075 ± 0.005 | 77 ± 1.8   |
| 19                   | Rondo, Regent         | KP               | 92             | r     | 0.03 ± 0.001                                       | 602.1 ± 17.8 | 6.21 ± 0.42 | 1.11 ± 0.094 | 60.51 ± 1.10 | 0.66 ± 0.011 | 0.58 ± 0.091 | 0.66 ± 0.067 | 17.03 ± 0.75 | 1284 ± 17    | 891.2 ± 23.8 | 0.32 ± 0.058 | 2.12 ± 0.21 | 29.91 ± 1.0  | 2.49 ± 0.28  | 380.9 ± 10.9 | 64.17 ± 1.45 | 349.9 ± 9.12 | 1.47 ± 0.14  | 11.55 ± 0.87 | <0.021 | 197.1 ± 7.9 | 24.71 ± 1.05 | 0.57 ± 0.019 | 66.6 ± 1.4 | 1330 ± 23 | 2.27 ± 0.27 | 6.03 ± 0.29 | 2.409 ± 0.21  | 68.9 ± 1.6 |
| 20                   | Rondo                 | SC               | 320            | r     | 0.03 ± 0.003                                       | 2489 ± 35.8  | 7.57 ± 0.46 | 12.32 ± 0.56 | 200.6 ± 4.2  | 1.48 ± 0.10  | 0.45 ± 0.067 | 1.89 ±       | 13.12 ± 0.61 | 1101 ± 16    | 2209 ± 39    | 0.32 ± 0.072 | 6.03 ± 0.28 | 18.94 ± 0.98 | 1.96 ± 0.21  | 3554 ± 42    | 138.9 ± 2.1  | 23.35 ± 0.26 | 0.54 ± 0.015 | 1.68 ± 0.14  | <0.021 | 610.1 ± 8.2 | 23.81 ± 1.11 | 0.95 ± 0.024 | 68.5 ± 1.3 | 1750 ± 19 | 2.19 ± 0.28 | 8.73 ± 0.43 | 0.122 ± 0.001 | 88.1 ± 1.9 |

KP, Kuyavian-Pomerania; LP, Lesser Poland; M, Masovia; P, Pomerania; r, red; SC, Subcarpatia; w, white; WP, West Pomerania



**Table S2.** Calibration curve parameters, LOD and LOQ values of ICP-MS/ICP-OES analytical techniques.

| Element                      | Mass       | R       | 1st term | Const.   | LOD [ $\mu\text{g L}^{-1}$ ]<br>3s | LOQ [ $\mu\text{g L}^{-1}$ ]<br>10s |
|------------------------------|------------|---------|----------|----------|------------------------------------|-------------------------------------|
| Ag                           | 107        | 0.99999 | 0.107421 | -0.00542 | 0.001                              | 0.003                               |
| Al                           | 27         | 0.99997 | 0.037549 | -1.30754 | 0.031                              | 0.103                               |
| As                           | 75         | 0.99999 | 2.699769 | -0.01012 | 0.006                              | 0.021                               |
| B                            | 11         | 0.99946 | 0.236112 | -2.76755 | 0.418                              | 1.395                               |
| Ba                           | 138        | 0.98317 | 0.423326 | 4.314401 | 0.001                              | 0.005                               |
| Bi                           | 209        | 0.99939 | 0.153274 | -0.09111 | 0.008                              | 0.029                               |
| Cd                           | 114        | 0.99957 | 0.311808 | 0.011723 | 0.002                              | 0.007                               |
| Co                           | 59         | 0.99999 | 0.143494 | -0.0302  | 0.002                              | 0.006                               |
| Cr                           | 52         | 0.99896 | 0.30841  | 0.131909 | 0.036                              | 0.123                               |
| Cu                           | 63         | 0.99993 | 0.161124 | -3.20904 | 0.368                              | 1.227                               |
| Fe                           | 56         | 0.99828 | 0.231216 | 2.390056 | 0.354                              | 1.183                               |
| Hg                           | 201        | 0.99731 | 0.586196 | 0.022925 | 0.004                              | 0.016                               |
| Li                           | 7          | 0.99996 | 0.120225 | -0.06093 | 0.001                              | 0.003                               |
| Mn                           | 55         | 0.99974 | 0.584364 | -1.07639 | 0.011                              | 0.034                               |
| Mo                           | 95         | 0.98929 | 0.467504 | -0.07762 | 0.003                              | 0.012                               |
| Na                           | 23         | 0.99735 | 0.002412 | -13.8966 | 0.032                              | 0.106                               |
| Ni                           | 60         | 0.98474 | 0.489872 | -0.93239 | 0.03                               | 0.115                               |
| Pb                           | 206        | 0.99691 | 0.472782 | 0.402906 | 0.004                              | 0.013                               |
| Sb                           | 121        | 0.99962 | 0.41178  | -0.01728 | 0.002                              | 0.006                               |
| Se                           | 78         | 0.99998 | 46.57817 | -0.06415 | 0.061                              | 0.202                               |
| Sn                           | 115        | 0.99646 | 0.970044 | -0.06483 | 0.021                              | 0.069                               |
| Sn                           | 116        | 0.99999 | 0.763471 | -0.11474 | 0.020                              | 0.067                               |
| Sr                           | 88         | 0.98165 | 0.643907 | 4.663796 | 0.003                              | 0.011                               |
| Ti                           | 47         | 0.99617 | 14.98718 | 2.094714 | 0.082                              | 0.274                               |
| Tl                           | 205        | 0.99997 | 0.124699 | 0.040403 | 0.0002                             | 0.0006                              |
| V                            | 51         | 0.99844 | 0.52999  | -0.02537 | 0.003                              | 0.012                               |
| Zn                           | 66         | 0.98432 | 0.680617 | 5.323809 | 0.017                              | 0.059                               |
| Zr                           | 90         | 1       | 0.175333 | 0.06953  | 0.002                              | 0.009                               |
| Element                      | Wavelength | r       | c        | d        | LOD [ $\mu\text{g L}^{-1}$ ]<br>3s | LOQ [ $\mu\text{g L}^{-1}$ ]<br>10s |
| Ca (7 L min <sup>-1</sup> )  | 393.3      | 0.99936 | 0.2546   | -2.661   | 0.333                              | 1.110                               |
| Ca (10 L min <sup>-1</sup> ) | 393.3      | 0.99922 | 0.2271   | -0.0513  | 0.375                              | 1.250                               |
| Mg (7 L min <sup>-1</sup> )  | 279.5      | 0.99997 | 0.0404   | -0.4139  | 0.070                              | 0.233                               |
| Mg (10 L min <sup>-1</sup> ) | 279.5      | 0.99891 | 0.0493   | -0.0047  | 0.042                              | 0.140                               |
| K (7 L min <sup>-1</sup> )   | 766.4      | 0.99854 | 0.5249   | 0.0434   | 1.465                              | 4.884                               |
| K (10 L min <sup>-1</sup> )  | 766.4      | 0.99811 | 0.3773   | -2.8110  | 0.332                              | 1.108                               |

Table S3. Validation report of ICP-MS analytical technique.

## No Gas

## Inten. / Peak

| Elem | Mass | Inten. Min | Inten.(kcp s) | Inten. Judge | RSD Max(%) | Meas. RSD (%) | RSD Judge |
|------|------|------------|---------------|--------------|------------|---------------|-----------|
|      |      | (kcps)     |               |              |            |               |           |
| Be   | 9    | 50         | 90.1738       | Good         | 3          | 2.4           | Good      |
| In   | 115  | 200        | 390.4566      | Good         | 3          | 0.7           | Good      |
| Bi   | 209  | 150        | 385.1826      | Good         | 3          | 1.2           | Good      |

## Mass axis

| Elem | Mass | Max gap (u) | Meas. gap (u) | Meas. qa Judge | Resoluti R value( | Meas. resolution (u) | Resolution Judge |
|------|------|-------------|---------------|----------------|-------------------|----------------------|------------------|
|      |      |             |               |                |                   |                      |                  |
| Be   | 9    | 0.10        | 0.05          | Good           | 0.9               | 0.77                 | Good             |
| In   | 115  | 0.10        | 0.06          | Good           | 0.9               | 0.73                 | Good             |
| Bi   | 209  | 0.10        | 0.08          | Good           | 0.9               | 0.74                 | Good             |

## Oxide / Divalent / BG

| Item     | Formula   | Unit | Max     | Meas.   | Judge | Output intensity | Standard element int |
|----------|-----------|------|---------|---------|-------|------------------|----------------------|
| Ce Oxid  | 156 / 14  | %    | 5.00    | 1.27    | Good  | 5.5901           | 439.6427             |
| Ce Dival | 70.0 / 14 | %    | 5.00    | 1.23    | Good  | 5.5486           | 452.5296             |
| BG       | 5         | kcps | 0.10000 | 0.00548 | Good  |                  |                      |
| BG       | 220       | kcps | 0.01000 | 0.00044 | Good  |                  |                      |

## Use Gas

## Inten. / Peak

| Elem | Mass | Inten. Min | Inten.(kcp s) | Inten. Judge | RSD Max(%) | Meas. RSD (%) | RSD Judge |
|------|------|------------|---------------|--------------|------------|---------------|-----------|
|      |      | (kcps)     |               |              |            |               |           |
| Co   | 59   | 30         | 80.8148       | Good         | 3          | 1.0           | Good      |

## Mass axis

| Elem | Mass | Max gap (u) | Meas. gap (u) | Meas. qa Judge | Resoluti R value( | Meas. resolution (u) | Resolution Judge |
|------|------|-------------|---------------|----------------|-------------------|----------------------|------------------|
|      |      |             |               |                |                   |                      |                  |
| Co   | 59   | 0.10        | 0.06          | Good           | 0.9               | 0.73                 | Good             |

## Oxide / Divalent / BG

| Item | Formula | Unit | Max     | Meas.   | Judge | Output intensity | Standard element int |
|------|---------|------|---------|---------|-------|------------------|----------------------|
| BG   | 78      | kcps | 0.10000 | 0.00448 | Good  |                  |                      |
